# Supplementary material for: Carbon supported catalysts in low temperature steam reforming of ethanol: study of catalyst performance
Source: Royal Society of Chemistry journal article supplement (doi:10.1039/c5ra07282d), 2015-01-01
Supplement: c5ra07282d1.pdf [file c5ra07282d1.pdf]

Supplementary information:

## Carbon supported catalysts in low temperature steam reforming of ethanol: Study of catalyst performance

Anne-Riikka Rautio,<sup>1\*</sup> Prem Kumar Seelam,<sup>2</sup> Päivi Mäki-Arvela,<sup>3</sup> Olli Pitkänen,<sup>1</sup> Mika HUUHTANEN,<sup>2</sup>

Riitta L. Keiski,<sup>2</sup> Krisztian Kordas<sup>1</sup>

<sup>1</sup>*Microelectronics and Materials Physics Laboratories, Department of Electrical Engineering, Faculty of Information Technology and Electrical Engineering, University of Oulu, P.O. Box 4500, FI-90014 Oulu, Finland*

<sup>2</sup>*Environmental and Chemical Engineering, Faculty of Technology, P.O. Box 4500, FI-90014 Oulu, Finland*

<sup>3</sup>*Johan Gadolin Process Chemistry Centre, Åbo Akademi University, FI-20500 Åbo, Finland*

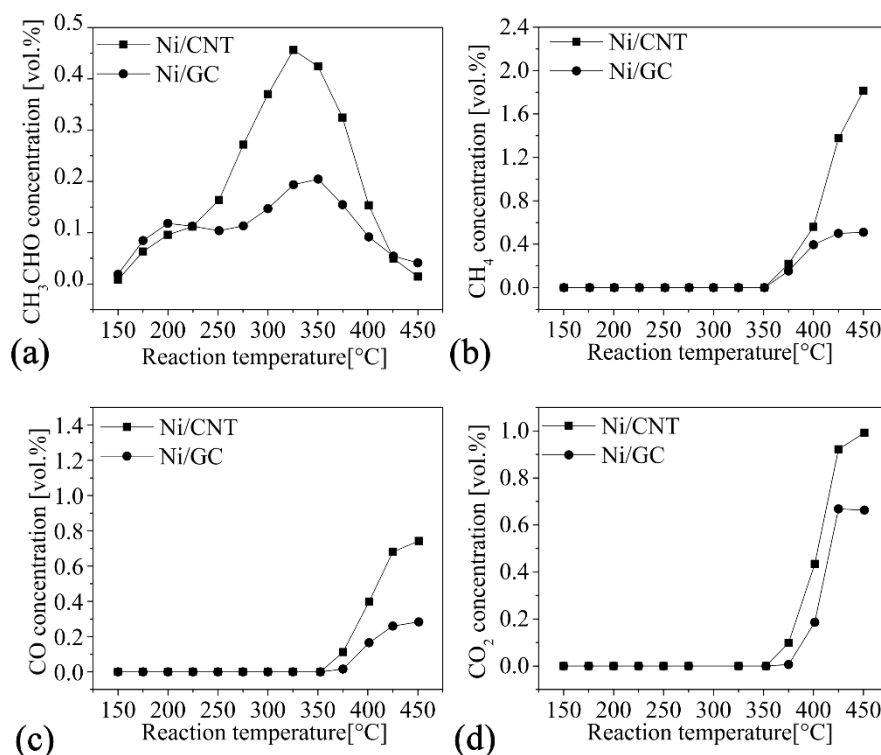

**Figure S1** The concentrations (vol.%) of minor products formed over Ni supported catalysts (Ni/CNT and Ni/GC) in SRE reaction: (a) CH<sub>3</sub>CHO, (b) CH<sub>4</sub>, (c) CO and (d) CO<sub>2</sub>.

\* Corresponding author. Tel+358 50 364 5199. E-mail: [anneriik@ee.oulu.fi](mailto:anneriik@ee.oulu.fi) (A.-R. Rautio)

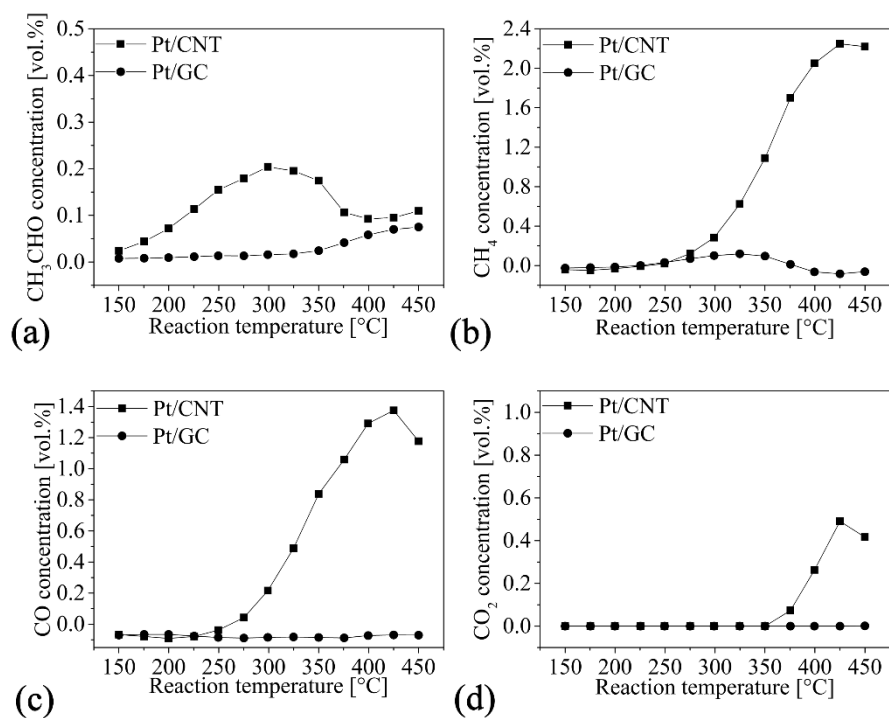

**Figure S2** The concentrations (vol.%) of minor products formed over Pt supported catalysts (Pt/CNT and Pt/GC) in SRE reaction: (a)  $\text{CH}_3\text{CHO}$ , (b)  $\text{CH}_4$ , (c)  $\text{CO}$  and (d)  $\text{CO}_2$ .

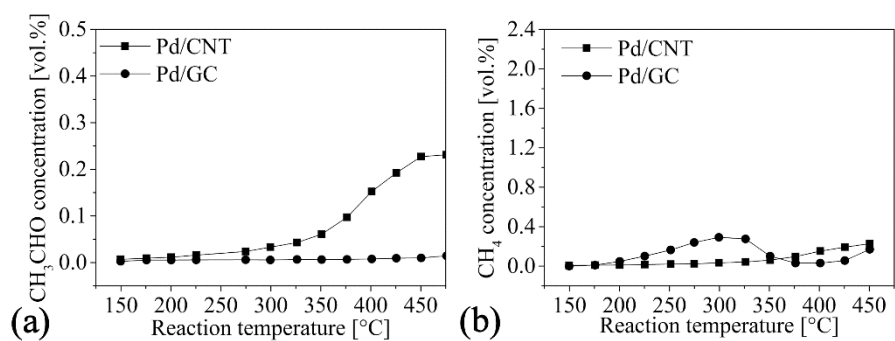

**Figure S3** The concentrations (vol.%) of minor products formed over Pd supported catalysts (Pd/CNT and Pd/GC) in SRE reaction: (a)  $\text{CH}_3\text{CHO}$  and (b)  $\text{CH}_4$ .

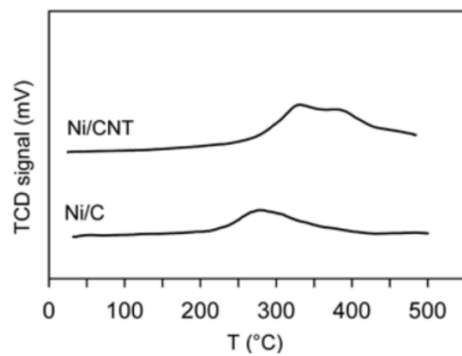

**Figure S4** TPR-H<sub>2</sub> profiles of Ni doped carbon-based catalysts.

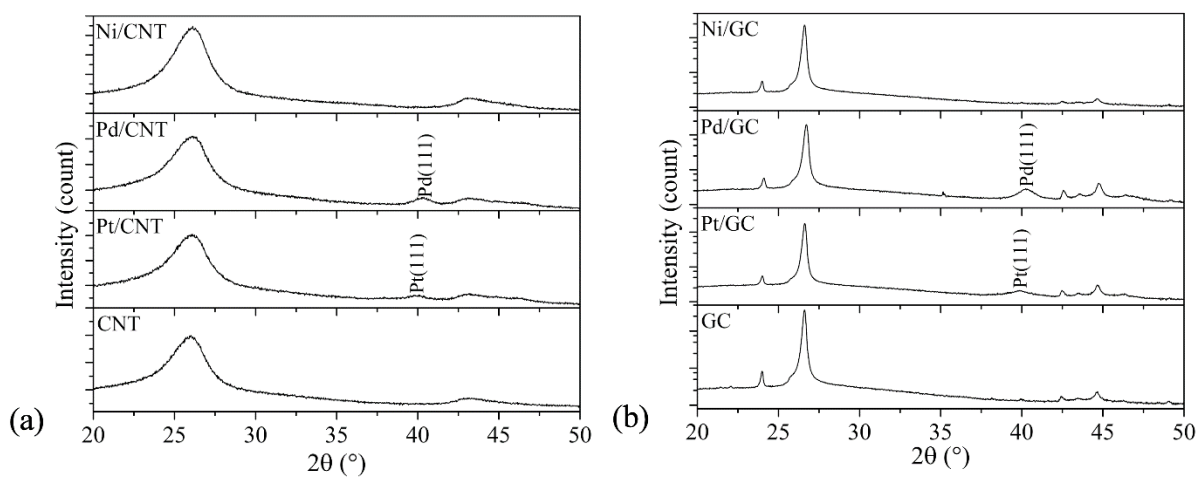

**Figure S5** XRD patterns recorded to catalyst materials and their supports. (XRD patterns: Pt: 00-004-0802; Pd: 00-046-1043.)
